# Supplementary material for: Systematic Analysis of Zn2Cys6 Transcription Factors Required for Development and Pathogenicity by High-Throughput Gene Knockout in the Rice Blast Fungus
Source: PubMed Central journal article supplement (PMC4192604; doi:10.1371/journal.ppat.1004432), 2014-10-09

**A**

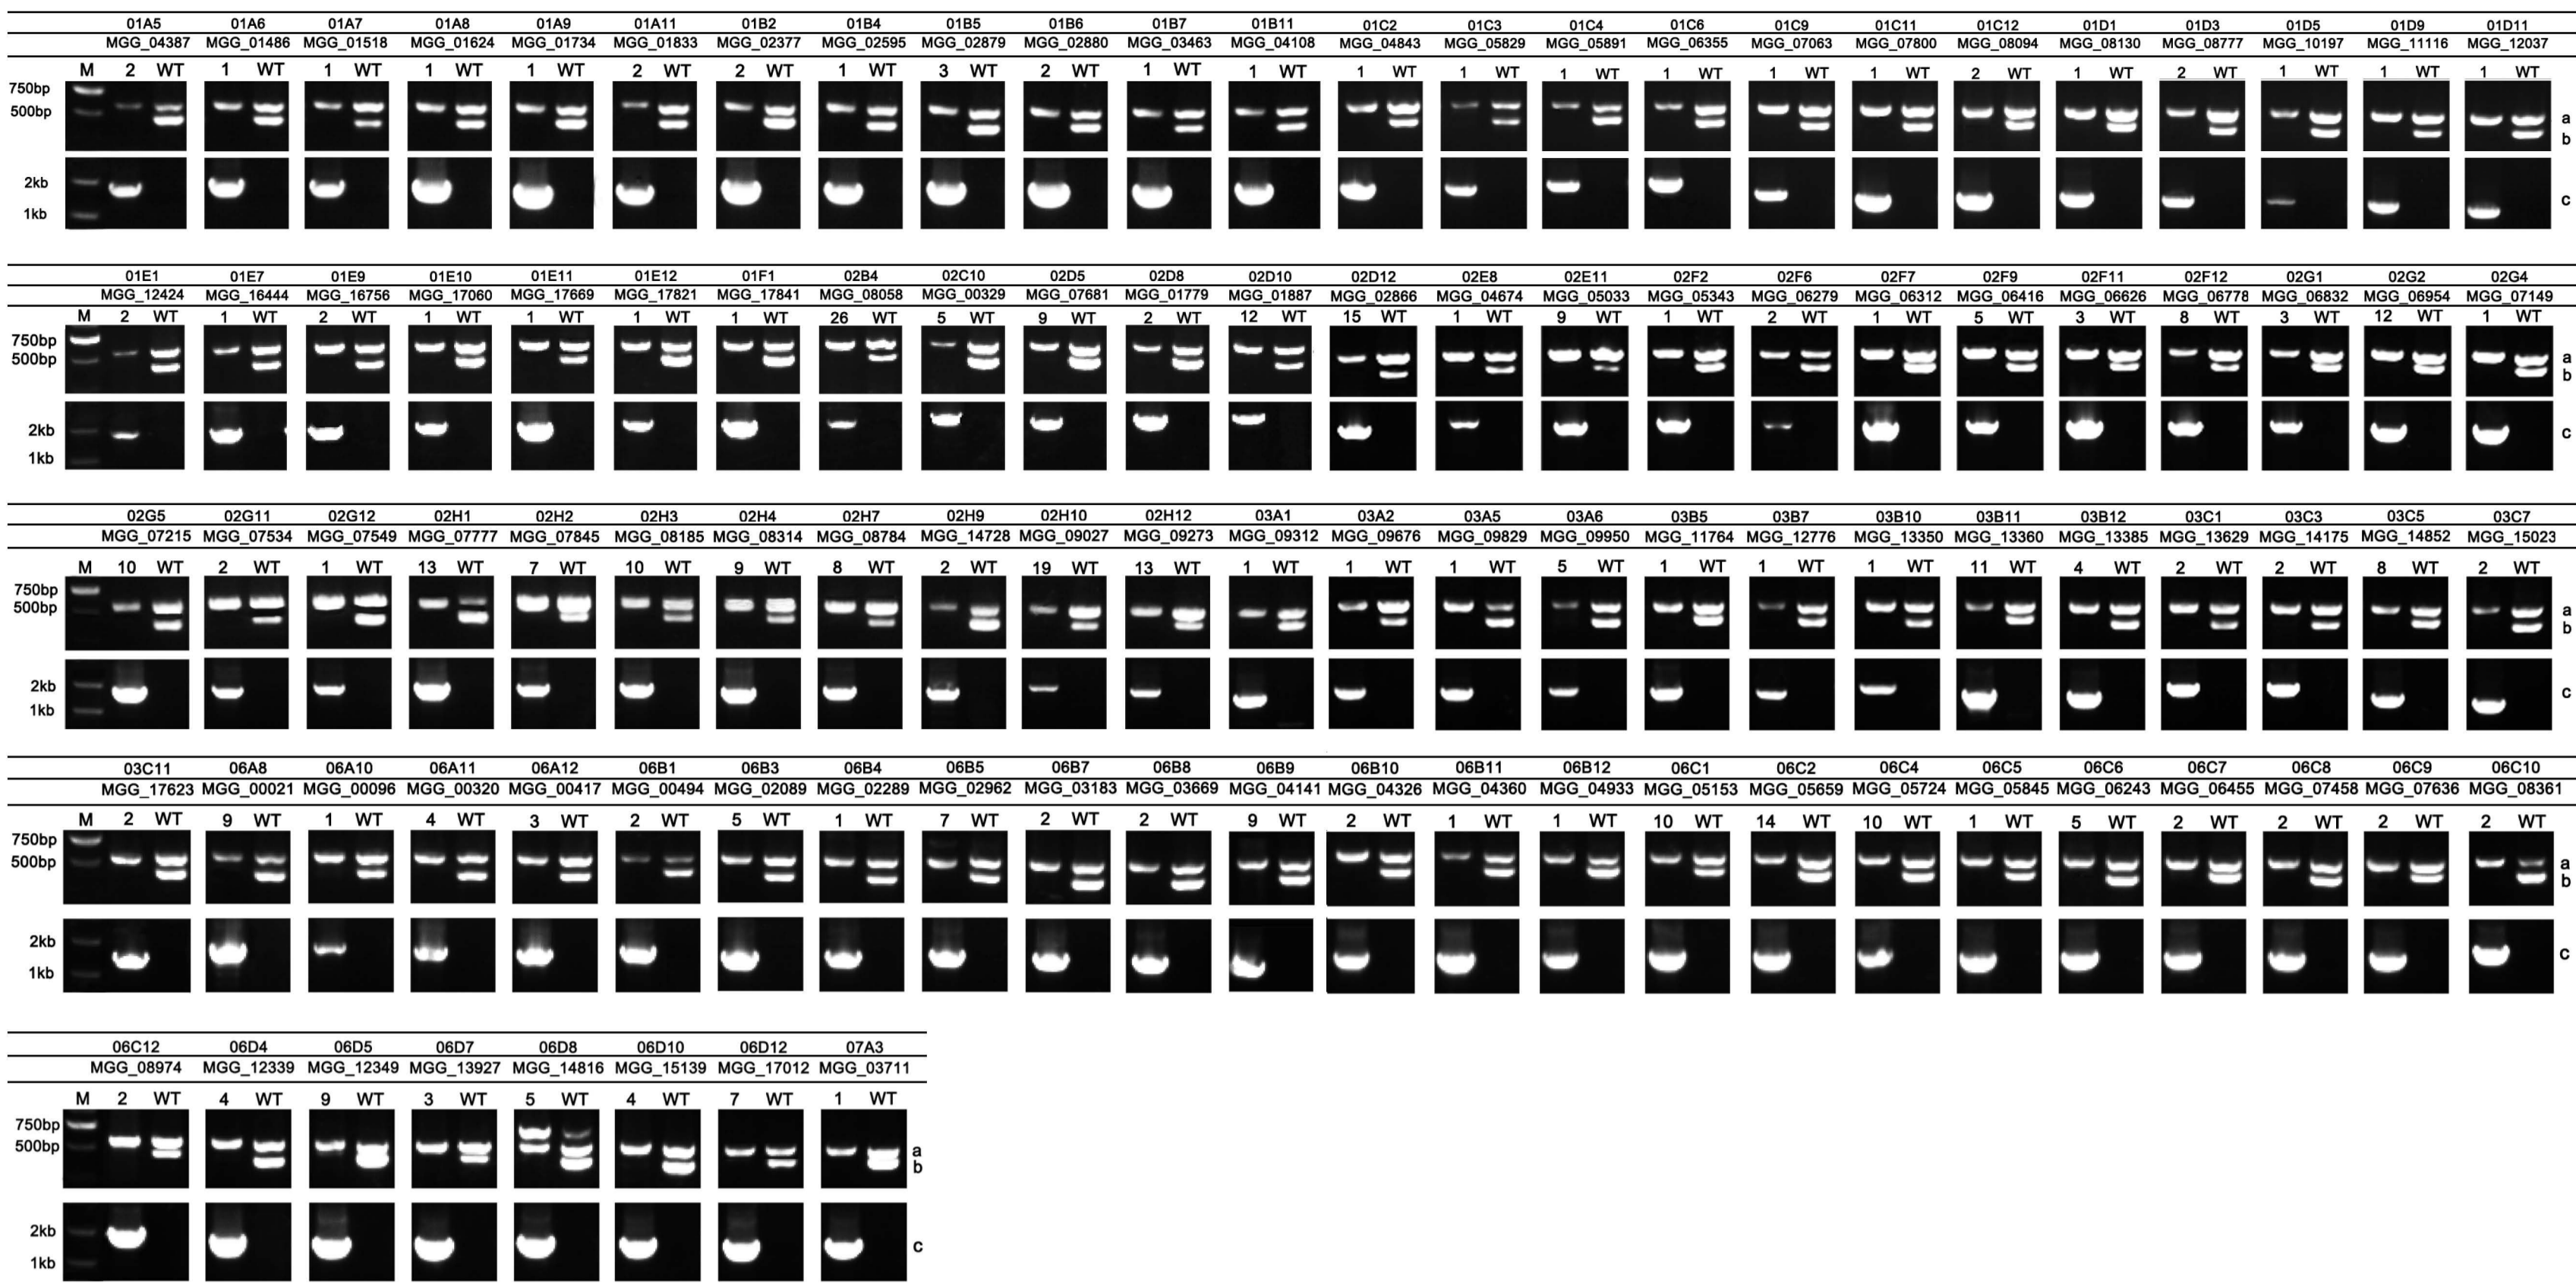

**B**

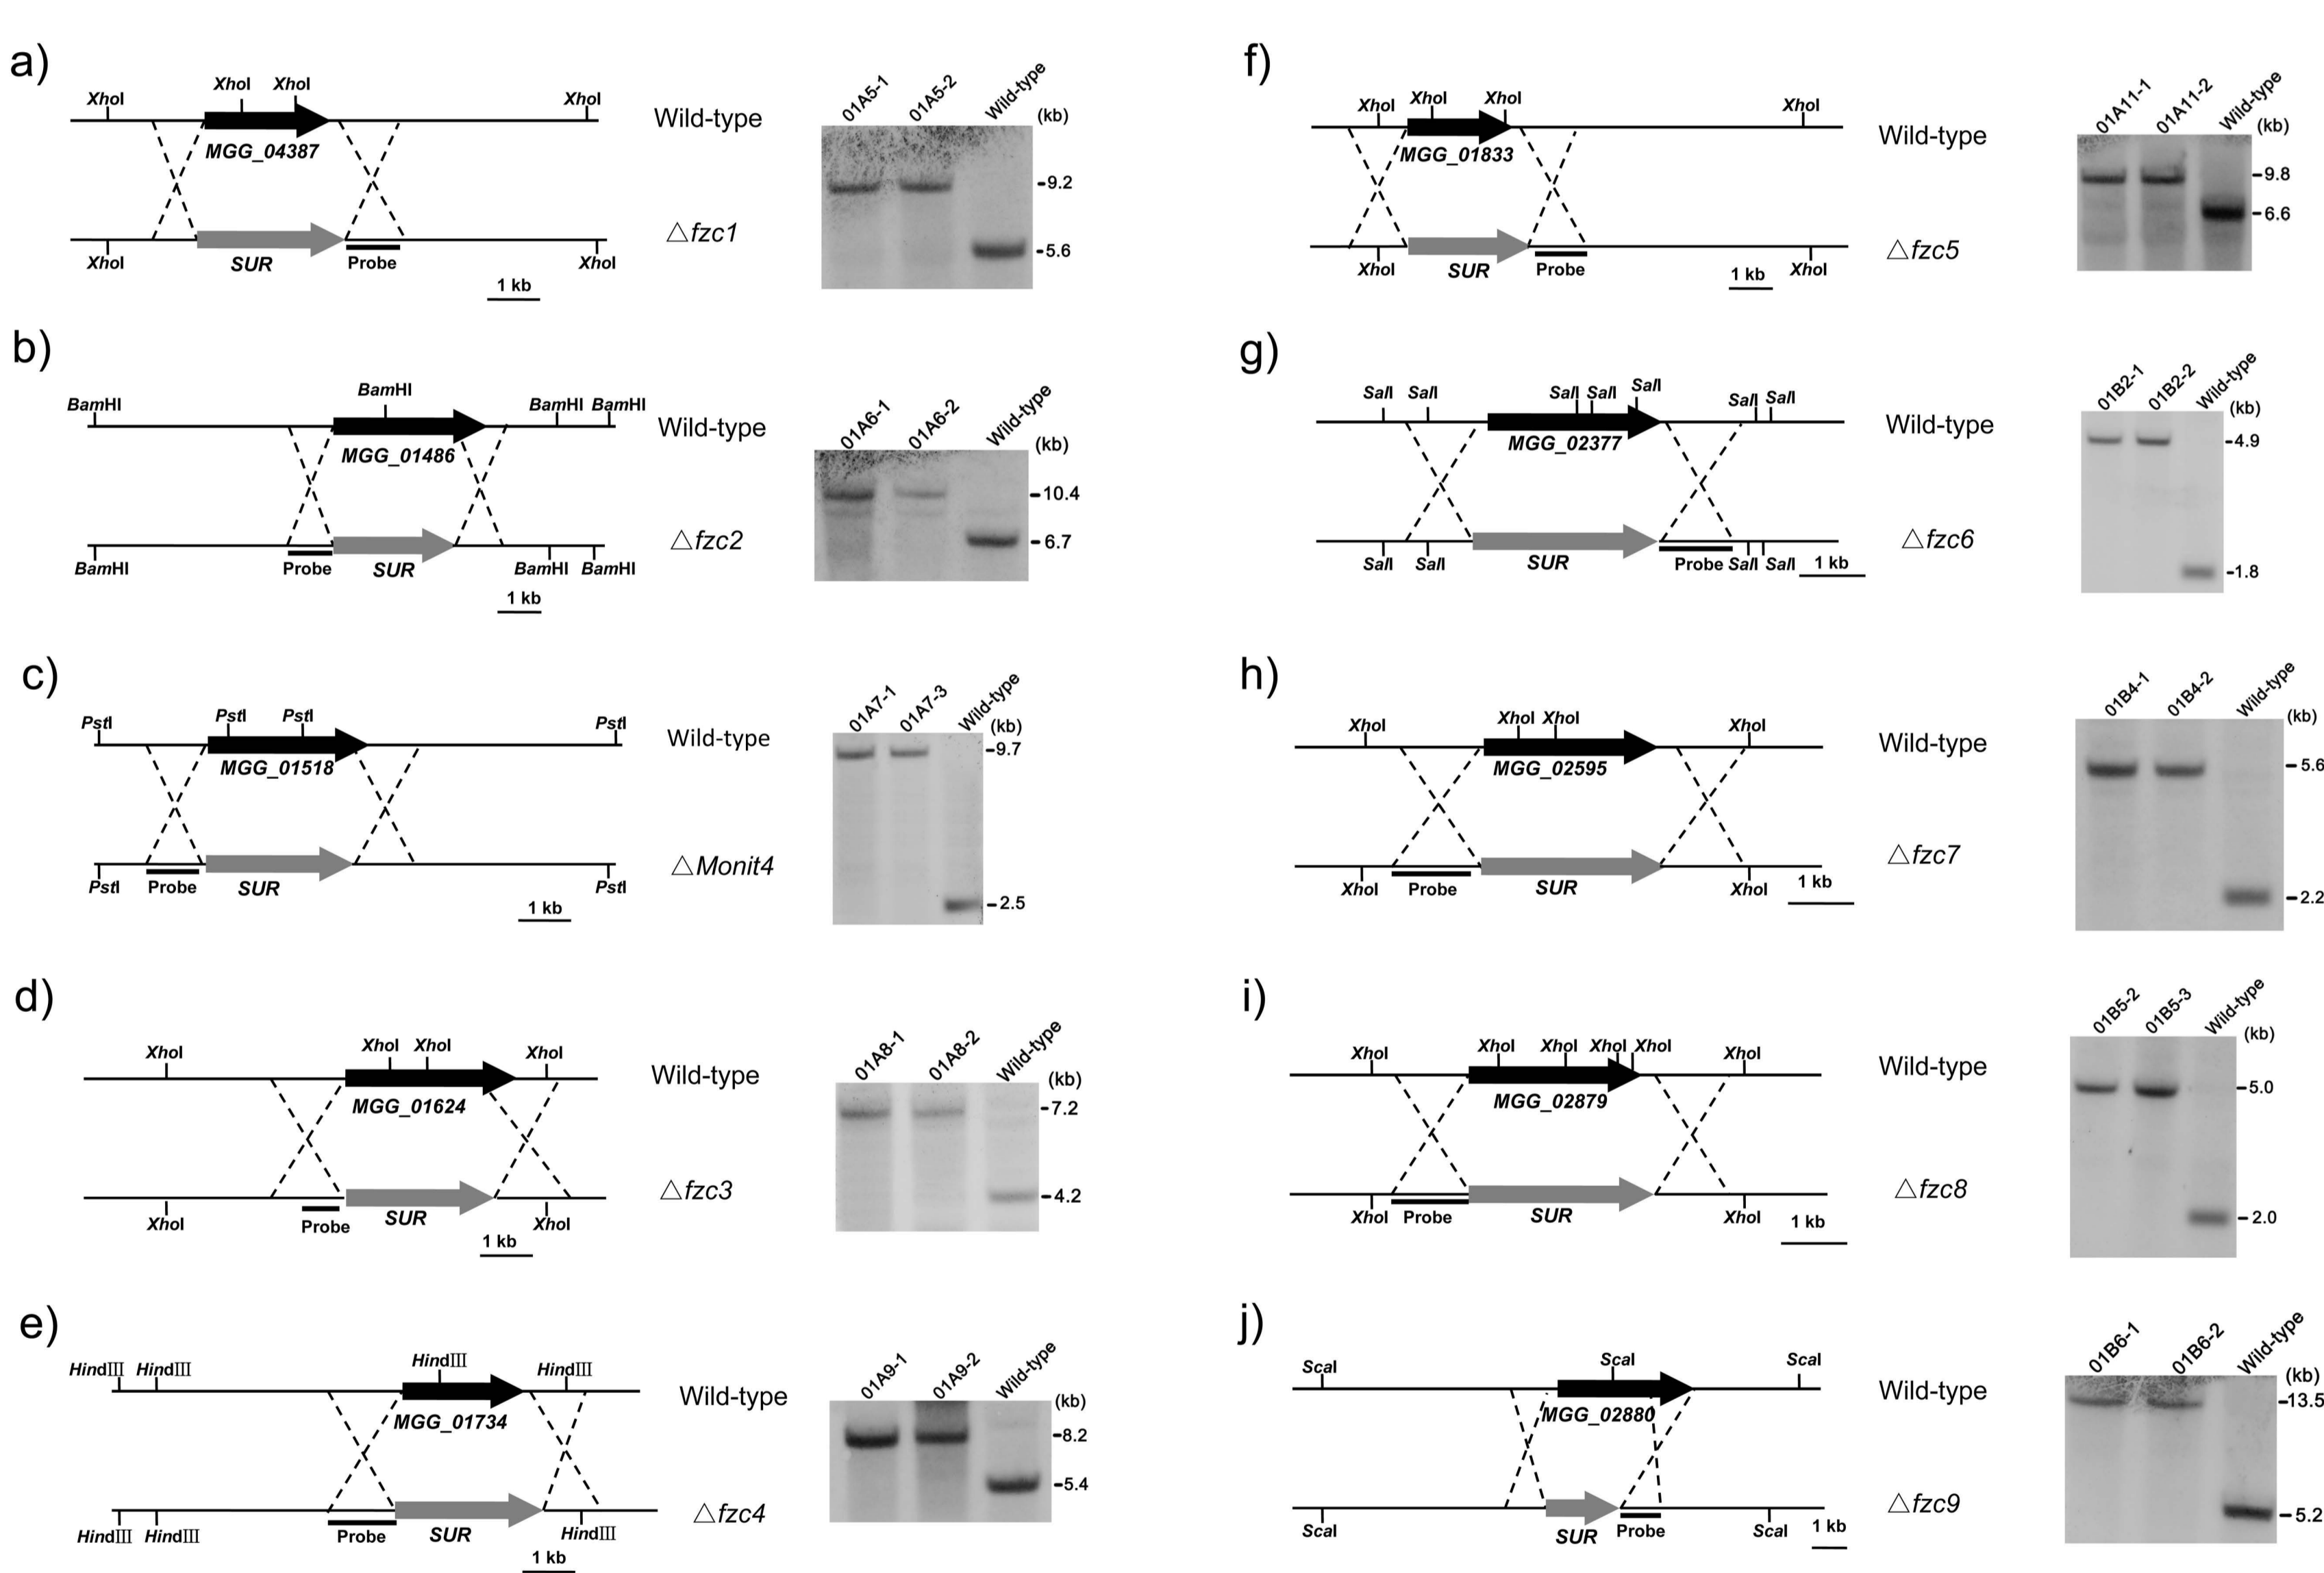

**C**

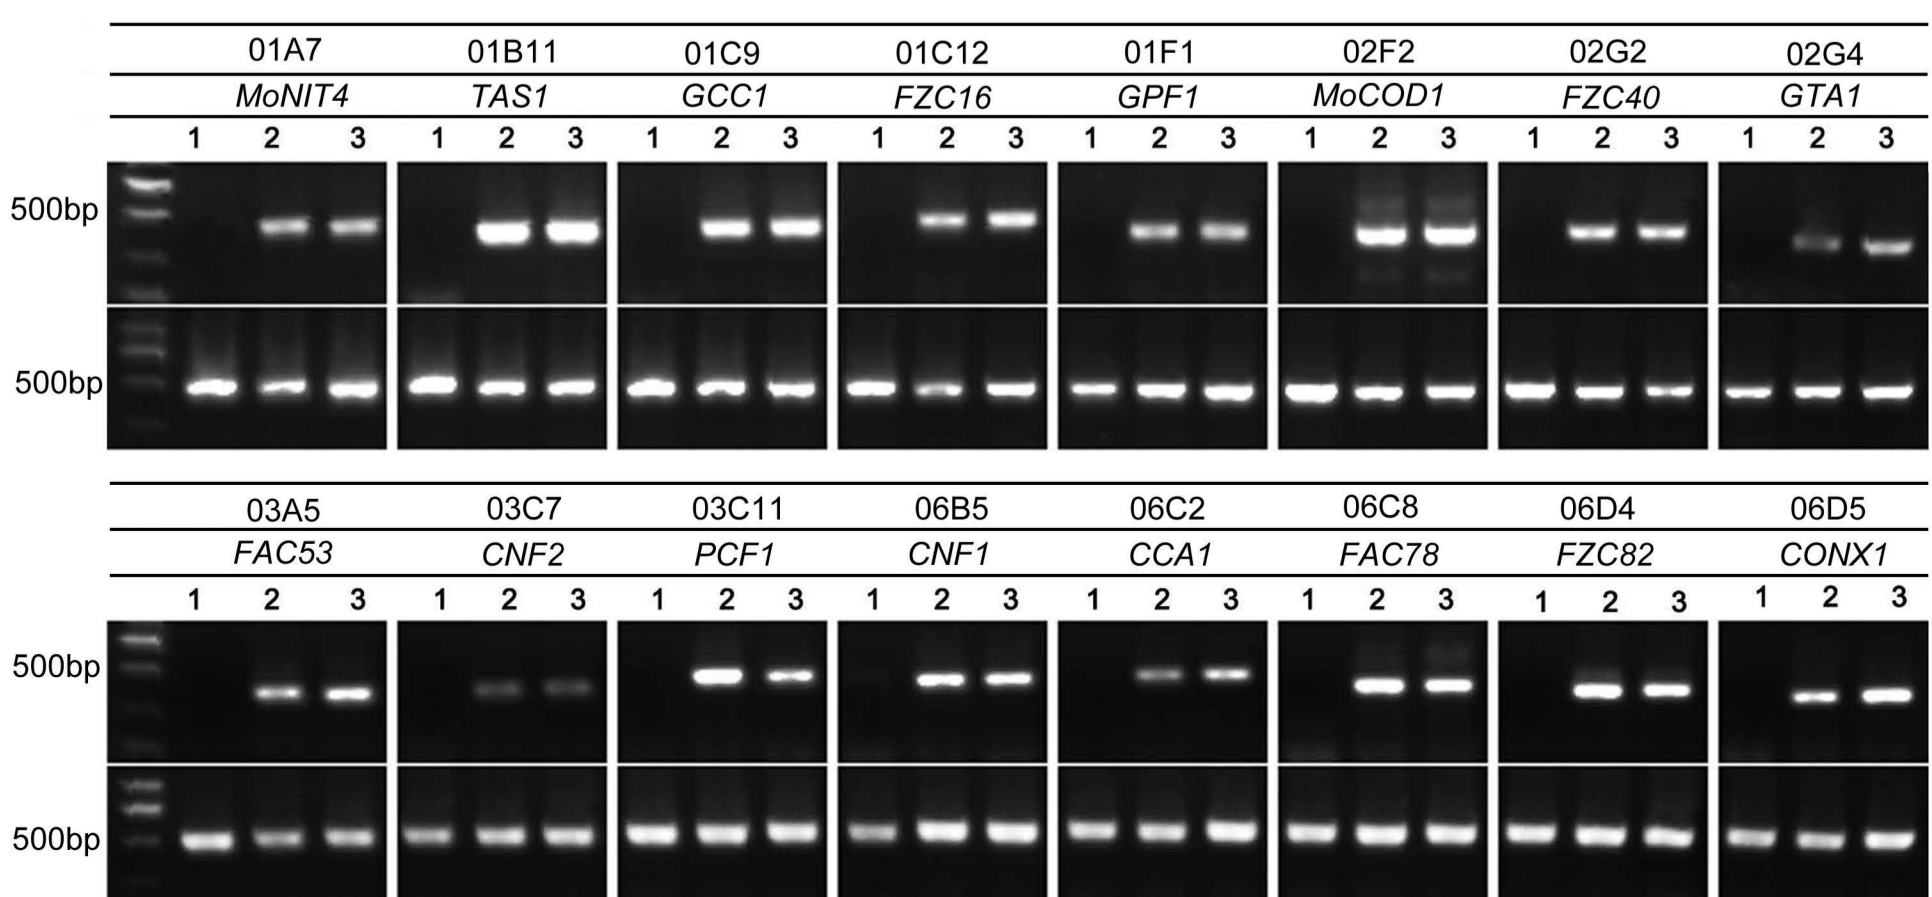

Supplement: ppat.1004432.s004.pdf [file ppat.1004432.s004.pdf]
